# Supplementary material
Source: publisher site journal article supplement (https://www.dovepress.com/article/339787)
Supplement: Supplementary file 1 [file get_supplementary_file.php]

Supplementary Fig.S1


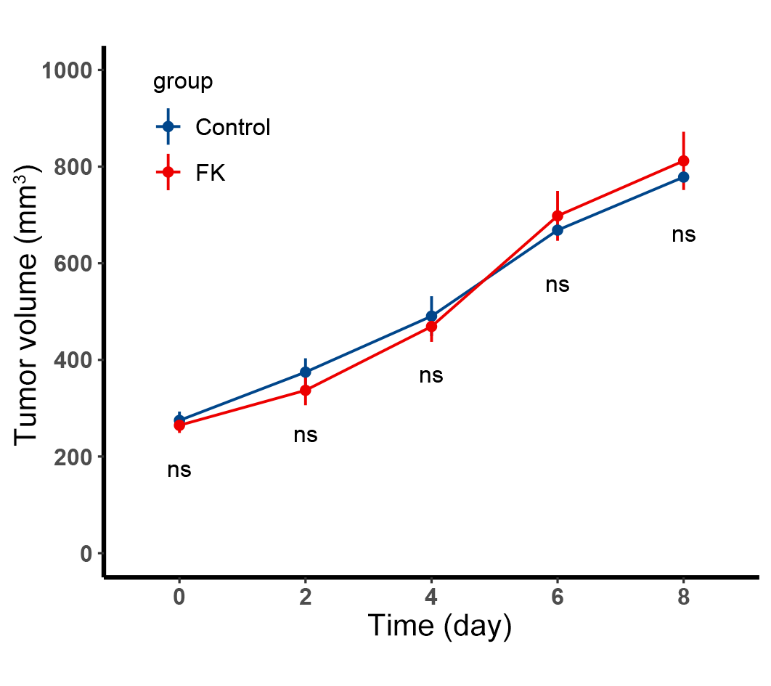


Fig.S1 **FK866 has no effect on the proliferation of H1975.** Tumor volume of single H1975 was compared between vehicle control and FK866 administration group at each time point, and there was no significant difference between the two groups (n=3), ns, not significant.
